# Supplementary material for: Nitric Oxide (NO) Differentially Modulates the Ascorbate Peroxidase (APX) Isozymes of Sweet Pepper (Capsicum annuum L.) Fruits
Source: Antioxidants (Basel). 2022 Apr 12;11(4):765. doi: 10.3390/antiox11040765 (PMC9029456; doi:10.3390/antiox11040765)
Supplement: Supplementary file 1 [file antioxidants-11-00765-s001.zip › antioxidants-1673774-supplementary-done.pdf]

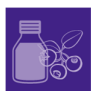

**Figure S1.** Representative picture of the experimental strategy used in this study with the phenotype of sweet pepper (*Capsicum annuum* L.) fruits at different stages and treatments: immature green, breaking point 1 (BP1), breaking point 2 without nitric oxide (NO) treatment (BP2 – NO), breaking point 2 with NO treatment (BP2 + NO), and ripe red. Pepper fruits were subjected to a NO-enriched atmosphere (5 ppm) in a methacrylate box for one hour and were then stored at room temperature (RT) for 3 days. Reproduced with permission from González-Gordo et al. (2020).

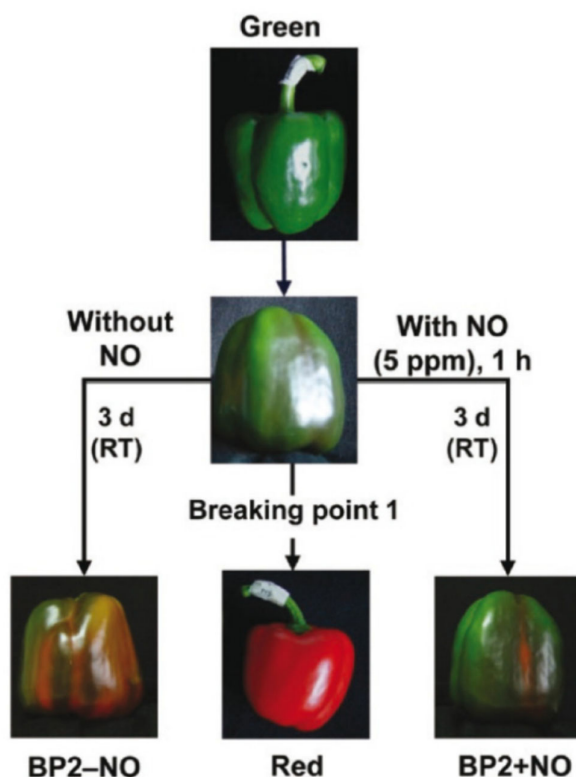

**Table S1.** Percentage of amino acid identity among the six Ca-APX isozymes.

|               |               |               |               |               |               |               |
|---------------|---------------|---------------|---------------|---------------|---------------|---------------|
| <b>CaAPX1</b> | <b>100%</b>   |               |               |               |               |               |
| <b>CaAPX2</b> | 50.61%        | <b>100%</b>   |               |               |               |               |
| <b>CaAPX3</b> | 51.84%        | <u>91.94%</u> | <b>100%</b>   |               |               |               |
| <b>CaAPX4</b> | 64.49%        | 45.56%        | 46.37%        | <b>100%</b>   |               |               |
| <b>CaAPX5</b> | <u>85.31%</u> | 49.80%        | 51.02%        | 55.75%        | <b>100%</b>   |               |
| <b>CaAPX6</b> | 66.12%        | 47.77%        | 48.58%        | <u>87.04%</u> | 67.35%        | <b>100%</b>   |
|               | <b>CaAPX1</b> | <b>CaAPX2</b> | <b>CaAPX3</b> | <b>CaAPX4</b> | <b>CaAPX5</b> | <b>CaAPX6</b> |

**Table S2.** Evaluation of the best scored models of APX1 output by the servers M4T, Phyre2, Raptor X and Swiss model

| Sever       | model | Qmean4 <sup>a</sup><br>(Qmean-Z score <sup>b</sup> ) | Errat <sup>c</sup> | Verify3D <sup>d</sup> | Procheck <sup>e</sup> |
|-------------|-------|------------------------------------------------------|--------------------|-----------------------|-----------------------|
| M4T         | 1     | 0.782<br>(0.101)                                     | 90.3766            | 86.64%                | 95.7% (0.5%)          |
| Phyre2      | 1     | 0.785<br>(0.119)                                     | 86.6953            | 98.77%                | 95.6% (0.5%)          |
|             | 2     | 0.790<br>(0.284)                                     | 88.0851            | 100%                  | 96.6% (0.5%)          |
|             | 3     | 0.669<br>(-2.634)                                    | 79.5745            | 99.59%                | 87.5% (0.5%)          |
|             | 4     | 0.663<br>(-2.711)                                    | 69.6581            | 76.31%                | 90.4% (0.5%)          |
|             | 5     | 0.590<br>(-4.514)                                    | 56.1983            | 84.22%                | 78.9% (1.4%)          |
|             | 8     | 0.661<br>(-2.759)                                    | 82.6613            | 91.60%                | 90.6% (1.3%)          |
|             | 11    | 0.729<br>(-1.178)                                    | 82.8326            | 90.12%                | 90.8% (0.0%)          |
|             | 14    | 0.557<br>(-5.364)                                    | 58.4677            | 81.64%                | 87.0% (0.9%)          |
|             | 19    | 0.534<br>(-5.899)                                    | 58.1673            | 74.52%                | 86.9% (0.9%)          |
| RaptorX     | 1     | 0.676<br>(-2.436)                                    | 72.1569            | 73.01%                | 92.8% (0.4%)          |
| Swiss Model | 1     | 0.799<br>(0.515)                                     | 98.7342            | 100%                  | 94.7% (0.0%)          |

<sup>a</sup> Model reliability ranging from 0 to 1.

<sup>b</sup> Degree of nativeness. QMEAN Z-score directly indicates how many standard deviations the model's QMEAN score differs from expected values for experimental structures.

<sup>c</sup> The error function is based on the statistics of non-bonded atom-atom interactions in the reported structure (compared to a database of reliable high-resolution structures). Generally speaking, the method is sensitive to smaller errors than 3-D Profile analysis.

<sup>d</sup> Analyzes the compatibility of an atomic model (3D) with its own amino acid sequence (1D). Each residue is assigned a structural class based on its location and environment (alpha, beta, loop, polar, nonpolar, etc.).

<sup>e</sup> Percentage of residues in the most favored regions of the Ramachandarn plot. In bracket those in the disallowed regions.

**Table S3.** Evaluation of the best scored models of APX2 output by the servers M4T, Phyre2, Raptor X and Swiss model

| Sever       | model | Qmean4 <sup>a</sup><br>(Qmean-Z score <sup>b</sup> ) | Errat <sup>c</sup> | Verify3D <sup>d</sup> | Procheck <sup>e</sup> |
|-------------|-------|------------------------------------------------------|--------------------|-----------------------|-----------------------|
| M4T         | 1     | 0.770<br>(-0.092)                                    | 91.3858            | 100%                  | 96.5% (0.0%)          |
| Phyre2      | 1     | 0.799<br>(0.632)                                     | 92.2406            | 97.45%                | 92.4% (0.0%)          |
|             | 2     | 0.582<br>(-4.790)                                    | 61.4545            | 75.79%                | 89.6% (0.4%)          |
|             | 3     | 0.579<br>(-4.834)                                    | 62.3616            | 78.80%                | 87.8% (1.3%)          |
|             | 4     | 0.587<br>(-4.679)                                    | 66.6667            | 78.87%                | 90.8% (0.8%)          |
|             | 5     | 0.526<br>(-6.617)                                    | 56.25              | 80.94%                | 79.0% (1.2%)          |
|             | 7     | 0.519<br>(-6.337)                                    | 67.5               | 78.60%                | 87.3% (0.9%)          |
|             | 16    | 0.466<br>(-8.300)                                    | 38.0952            | 77.15%                | 83.7% (1.2%)          |
| RaptorX     | 1     | 0.678<br>(-2.739)                                    | 76.1146            | 85.00%                | 90.1% (1.8%)          |
| Swiss Model | 1     | 0.792<br>(0.457)                                     | 93.633             | 100%                  | 94.8% (0.0%)          |

<sup>a</sup> Model reliability ranging from 0 to 1.

<sup>b</sup> Degree of nativeness. QMEAN Z-score directly indicates how many standard deviations the model's QMEAN score differs from expected values for experimental structures.

<sup>c</sup> The error function is based on the statistics of non-bonded atom-atom interactions in the reported structure (compared to a database of reliable high-resolution structures). Generally speaking, the method is sensitive to smaller errors than 3-D Profile analysis.

<sup>d</sup> Analyzes the compatibility of an atomic model (3D) with its own amino acid sequence (1D). Each residue is assigned a structural class based on its location and environment (alpha, beta, loop, polar, nonpolar, etc.).

<sup>e</sup> Percentage of residues in the most favored regions of the Ramachandarn plot. In bracket those in the disallowed regions.

**Table S4.** Evaluation of the best scored models of **APX3** output by the servers M4T, Phyre2, Raptor X and Swiss model

| Sever       | model | Qmean4 <sup>a</sup><br>(Qmean-Z score <sup>b</sup> ) | Errat <sup>c</sup> | Verify3D <sup>d</sup> | Procheck <sup>e</sup> |
|-------------|-------|------------------------------------------------------|--------------------|-----------------------|-----------------------|
| M4T         | 1     | 0.776<br>(0.042)                                     | 90.566             | 95.60%                | 95.6% (0.0%)          |
| Phyre2      | 1     | 0.793<br>(0.496)                                     | 95.8491            | 100%                  | 92.4% (0.0%)          |
|             | 2     | 0.566<br>(-5.097)                                    | 53.1381            | 82.47%                | 87.0% (0.5%)          |
|             | 3     | 0.503<br>(-6.698)                                    | 58.6066            | 77.95%                | 82.2% (1.0%)          |
|             | 4     | 0.567<br>(-5.145)                                    | 67.2065            | 87.45%                | 91.8% (0.5%)          |
|             | 5     | 0.551<br>(-5.537)                                    | 69.962             | 76.57%                | 89.0% (0.4%)          |
|             | 6     | 0.604<br>(-3.737)                                    | 75.2294            | 91.63%                | 83.5% (0.0%)          |
|             | 7     | 0.571<br>(-4.972)                                    | 68.3128            | 86.17%                | 90.4% (0.5%)          |
|             | 15    | 0.549<br>(-5.874)                                    | 73.7226            | 81.36%                | 90.0% (0.4%)          |
| RaptorX     | 1     | 0.751<br>(-0.569)                                    | 92.3077            | 95.04%                | 94.0% (0.9%)          |
| Swiss Model | 1     | 0.789<br>(0.374)                                     | 93.5849            | 100%                  | 94.7% (0.0%)          |

<sup>a</sup> Model reliability ranging from 0 to 1.

<sup>b</sup> Degree of nativeness. QMEAN Z-score directly indicates how many standard deviations the model's QMEAN score differs from expected values for experimental structures.

<sup>c</sup> The error function is based on the statistics of non-bonded atom-atom interactions in the reported structure (compared to a database of reliable high-resolution structures). Generally speaking, the method is sensitive to smaller errors than 3-D Profile analysis.

<sup>d</sup> Analyzes the compatibility of an atomic model (3D) with its own amino acid sequence (1D). Each residue is assigned a structural class based on its location and environment (alpha, beta, loop, polar, nonpolar, etc.).

<sup>e</sup> Percentage of residues in the most favored regions of the Ramachandarn plot. In bracket those in the disallowed regions.

**Table S5.** Evaluation of the best scored models of APX4 output by the servers M4T, Phyre2, Raptor X and Swiss model

| Sever       | model | Qmean4 <sup>a</sup><br>(Qmean-Z score <sup>b</sup> ) | Errat <sup>c</sup> | Verify3D <sup>d</sup> | Procheck <sup>e</sup> |
|-------------|-------|------------------------------------------------------|--------------------|-----------------------|-----------------------|
| M4T         | 1     | 0.800<br>(0.557)                                     | 91.7012            | 100%                  | 95.7% (0.0%)          |
| Phyre2      | 1     | 0.827<br>(1.203)                                     | 95.7               | 100%                  | 94.2% (0.5%)          |
|             | 2     | 0.586<br>(-4.646)                                    | 67.9167            | 82.56%                | 82.1% (0.5%)          |
|             | 3     | 0.789<br>(0.275)                                     | 97.9253            | 93.39%                | 94.2% (0.5%)          |
|             | 4     | 0.532<br>(-6.005)                                    | 44.1767            | 87.16%                | 84.6% (1.4%)          |
|             | 5     | 0.660<br>(-2.881)                                    | 65.4867            | 100%                  | 89.3% (0.0%)          |
|             | 6     | 0.596<br>(-4.394)                                    | 61.2               | 81.61%                | 87.9% (0.5%)          |
|             | 7     | 0.523<br>(-6.130)                                    | 57.6132            | 84.46%                | 84.7% (1.0%)          |
|             | 9     | 0.514<br>(-6.446)                                    | 40                 | 87.94%                | 75.6% (0.0%)          |
|             | 20    | 0.669<br>(-2.614)                                    | 67.364             | 82.59%                | 87.3% (0.5%)          |
| RaptorX     | 1     | 0.694<br>(-2.082)                                    | 70.2206            | 82.99%                | 93.5% (0.0%)          |
| Swiss Model | 1     | 0.814<br>(0.897)                                     | 96.2343            | 99.19%                | 95.1% (0.0%)          |

<sup>a</sup> Model reliability ranging from 0 to 1.

<sup>b</sup> Degree of nativeness. QMEAN Z-score directly indicates how many standard deviations the model's QMEAN score differs from expected values for experimental structures.

<sup>c</sup> The error function is based on the statistics of non-bonded atom-atom interactions in the reported structure (compared to a database of reliable high-resolution structures). Generally speaking, the method is sensitive to smaller errors than 3-D Profile analysis.

<sup>d</sup> Analyzes the compatibility of an atomic model (3D) with its own amino acid sequence (1D). Each residue is assigned a structural class based on its location and environment (alpha, beta, loop, polar, nonpolar, etc.).

<sup>e</sup> Percentage of residues in the most favored regions of the Ramachandarn plot. In bracket those in the disallowed regions.

**Table S6.** Evaluation of the best scored models of APX5 output by the servers M4T, Phyre2, Raptor X and Swiss model

| Sever       | model | Qmean4 <sup>a</sup><br>Qmean-Z score <sup>b</sup> | Errat <sup>c</sup> | Verify3D <sup>d</sup> | Procheck <sup>e</sup> |
|-------------|-------|---------------------------------------------------|--------------------|-----------------------|-----------------------|
| M4T         | 1     | 0.741<br>(-0.855)                                 | 84                 | 95.35%                | 94.5% (0.5%)          |
| Phyre2      | 1     | 0.717<br>(0.805)                                  | 83.691             | 99.59%                | 96.6% (0.0)           |
|             | 2     | 0.548<br>(0.805)                                  | 59.0164            | 83.20%                | 86.6% (1.8%)          |
|             | 3     | 0.564<br>(-5.141)                                 | 56.9721            | 81.92%                | 88.7% (0.9%)          |
|             | 4     | 0.544<br>(-5.687)                                 | 58.4677            | 81.64%                | 85.3% (1.4%)          |
|             | 5     | 0.645<br>(-3.211)                                 | 72.4576            | 97.13%                | 86.5% (0.0%)          |
|             | 6     | 0.806<br>(0.689)                                  | 90.2128            | 97.53%                | 97.1% (0.0%)          |
|             | 18    | 0.715<br>(-1.547)                                 | 87.931             | 91.36%                | 91.3% (0.5%)          |
| RaptorX     | 1     | 0.681<br>(-2.310)                                 | 74.2308            | 77.70%                | 92.3% (1.2%)          |
| Swiss Model | 1     | 0.812<br>(0.870)                                  | 97.4684            | 100%                  | 96.7% (0.0%)          |

<sup>a</sup> Model reliability ranging from 0 to 1.

<sup>b</sup> Degree of nativeness. QMEAN Z-score directly indicates how many standard deviations the model's QMEAN score differs from expected values for experimental structures.

<sup>c</sup> The error function is based on the statistics of non-bonded atom-atom interactions in the reported structure (compared to a database of reliable high-resolution structures). Generally speaking, the method is sensitive to smaller errors than 3-D Profile analysis.

<sup>d</sup> Analyzes the compatibility of an atomic model (3D) with its own amino acid sequence (1D). Each residue is assigned a structural class based on its location and environment (alpha, beta, loop, polar, nonpolar, etc.).

<sup>e</sup> Percentage of residues in the most favored regions of the Ramachandarn plot. In bracket those in the disallowed regions.

**Table S7.** Evaluation of the best scored models of **APX6** output by the servers M4T, Phyre2, Raptor X and Swiss model

| Sever       | model | Qmean4 <sup>a</sup><br>(Qmean-Z score <sup>b</sup> ) | Errat <sup>c</sup> | Verify3D <sup>d</sup> | Procheck <sup>e</sup> |
|-------------|-------|------------------------------------------------------|--------------------|-----------------------|-----------------------|
| M4T         | 1     | 0.818<br>(0.982)                                     | 86.25              | 99.60%                | 95.1% (0.0%)          |
| Phyre2      | 1     | 0.838<br>(1.451)                                     | 88.2845            | 100%                  | 95.6% (0.0%)          |
|             | 2     | 0.823<br>(1.100)                                     | 95.8159            | 100%                  | 95.6% (0.0%)          |
|             | 3     | 0.549<br>(-5.525)                                    | 43.5895            | 95.45%                | 81.9% (1.5%)          |
|             | 7     | 0.669<br>(-2.678)                                    | 77.9736            | 94.09%                | 92.2% (0.5%)          |
|             | 10    | 0.708<br>(-1.656)                                    | 69.6203            | 93.95%                | 90.8% (0.5%)          |
|             | 11    | 0.627<br>(-3.706)                                    | 68.3036            | 90.30%                | 85.7% (2.0%)          |
| RaptorX     | 1     | 0.810<br>(0.800)                                     | 88.0165            | 98.40%                | 96.6% (0.0%)          |
| Swiss Model | 1     | 0.851<br>(1.773)                                     | 97.8814            | 100%                  | 96.6% (0.0%)          |

<sup>a</sup> Model reliability ranging from 0 to 1.

<sup>b</sup> Degree of nativeness. QMEAN Z-score directly indicates how many standard deviations the model's QMEAN score differs from expected values for experimental structures.

<sup>c</sup> The error function is based on the statistics of non-bonded atom-atom interactions in the reported structure (compared to a database of reliable high-resolution structures). Generally speaking, the method is sensitive to smaller errors than 3-D Profile analysis.

<sup>d</sup> Analyzes the compatibility of an atomic model (3D) with its own amino acid sequence (1D). Each residue is assigned a structural class based on its location and environment (alpha, beta, loop, polar, nonpolar, etc.).

<sup>e</sup> Percentage of residues in the most favored regions of the Ramachandarn plot. In bracket those in the disallowed regions.

**Table S8.** Main features of the models of the tertiary structure of the pepper APX isozymes

| Isoform | Template <sup>1</sup> | % Identity <sup>2</sup> | Range (coverage) <sup>3</sup> | Server      |
|---------|-----------------------|-------------------------|-------------------------------|-------------|
| Ca-APX1 | 2ghh                  | 62.45                   | 2-246 (85%)                   | Swiss model |
| Ca-APX2 | liyn                  | 86.05                   | 90-364 (71%)                  | Swiss model |
| Ca-APX3 | liyn                  | 90.84                   | 73-345 (78%)                  | Phyre2      |
| Ca-APX4 | 2vcs                  | 82.00                   | 46-293 (85%)                  | Swiss model |
| Ca-APX5 | 2ghh                  | 62.45                   | 2-246 (85%)                   | Swiss model |
| Ca-APX6 | 2y6a                  | 83.87                   | 2-248 (99%)                   | Swiss model |

<sup>1</sup> Templated used for the modeling: **2ghh**: *Glycine max* APX (cytosolic), **liyn**: *Nicotiana tabacum* APX (chloroplastic), **2vcs**: *Glycine max* APX (cytosolic), **2y6a** *Glycine max* APX (R38A mutant).

<sup>2</sup> Identity between the modeled sequence and the template

<sup>3</sup> Residues (in brackets the percentage) modeled.

**Table S9.** Normalized RMS by alignment length and overall sequence length of the structural superposition of the models of the six APX isozymes.

|               |               |               |               |               |               |               |
|---------------|---------------|---------------|---------------|---------------|---------------|---------------|
| <b>CaAPX1</b> | <b>0</b>      |               |               |               |               |               |
| <b>CaAPX2</b> | 0.970         | <b>0</b>      |               |               |               |               |
| <b>CaAPX3</b> | 0.970         | 0.260         | <b>0</b>      |               |               |               |
| <b>CaAPX4</b> | 0.226         | 0.975         | 0.975         | <b>0</b>      |               |               |
| <b>CaAPX5</b> | <u>0.073</u>  | 0.969         | 0.969         | 0.231         | <b>0</b>      |               |
| <b>CaAPX6</b> | 0.250         | 0.983         | 0.983         | 0.252         | 0.256         | <b>0</b>      |
|               | <b>CaAPX1</b> | <b>CaAPX2</b> | <b>CaAPX3</b> | <b>CaAPX4</b> | <b>CaAPX5</b> | <b>CaAPX6</b> |

**Table S10.** Analysis of the superimposition of the six pepper APX isozymes on the structure of cytosolic pea APX (PDB entry 1APX)

|                            | CaAPX1 | CaAPX2 | CaAPX3 | CaAPX4 | CaAPX5 | CaAPX6 |
|----------------------------|--------|--------|--------|--------|--------|--------|
| <b>Rmsd<sup>1</sup></b>    | 0.431  | 0.980  | 0.979  | 0.335  | 0.436  | 0.317  |
| <b>SDM<sup>2</sup></b>     | 8.609  | 19.616 | 19.606 | 6.704  | 8.716  | 6.556  |
| <b>Q-score<sup>3</sup></b> | 0.964  | 0.735  | 0.740  | 0.976  | 0.964  | 0.973  |

<sup>1</sup> Normalized RMSD by alignment length and overall sequence length

<sup>2</sup> Structural Distance Measure (SDM) is zero for identical structures and increases as the similarity decreases.

<sup>3</sup> Q-score range from zero for completely dissimilar or un-superimposed structures to 1 for identical structures.
